# Supplementary material for: Investigating stimuli-responsive luminescence and aggregation-induced emission properties of o-carborane-based luminophores modified with phenanthrene or anthracene
Source: Royal Society of Chemistry journal article supplement (doi:10.1039/d3nj02815a), 2023-01-01
Supplement: d3nj02815a1.pdf [file d3nj02815a1.pdf]

## Supporting Information

### **Investigating Stimuli-Responsive Luminescence and Aggregation-Induced Emission Properties of *o*-Carborane- Based Luminophores Modified with Phenanthrene or Anthracene**

Li Wang, Rong-Jian Chen, Jian-Feng Yan,\* and Yao-Feng Yuan\*

Laboratory of Molecule Synthesis and Function Discovery (Fujian Province University),  
Department of Chemistry, Fuzhou University, Fuzhou 350108, China.

Corresponding to e-mail: [yanjianfeng@fzu.edu.cn](mailto:yanjianfeng@fzu.edu.cn); [yaofeng\\_yuan@fzu.edu.cn](mailto:yaofeng_yuan@fzu.edu.cn)

## Table of Contents

|                                                 |     |
|-------------------------------------------------|-----|
| I. Synthesis .....                              | S2  |
| II. Crystal data .....                          | S5  |
| III. Photophysical Properties. ....             | S7  |
| IV. NMR spectra and HRMS of new compounds ..... | S12 |
| V References .....                              | S24 |

## I. Synthesis

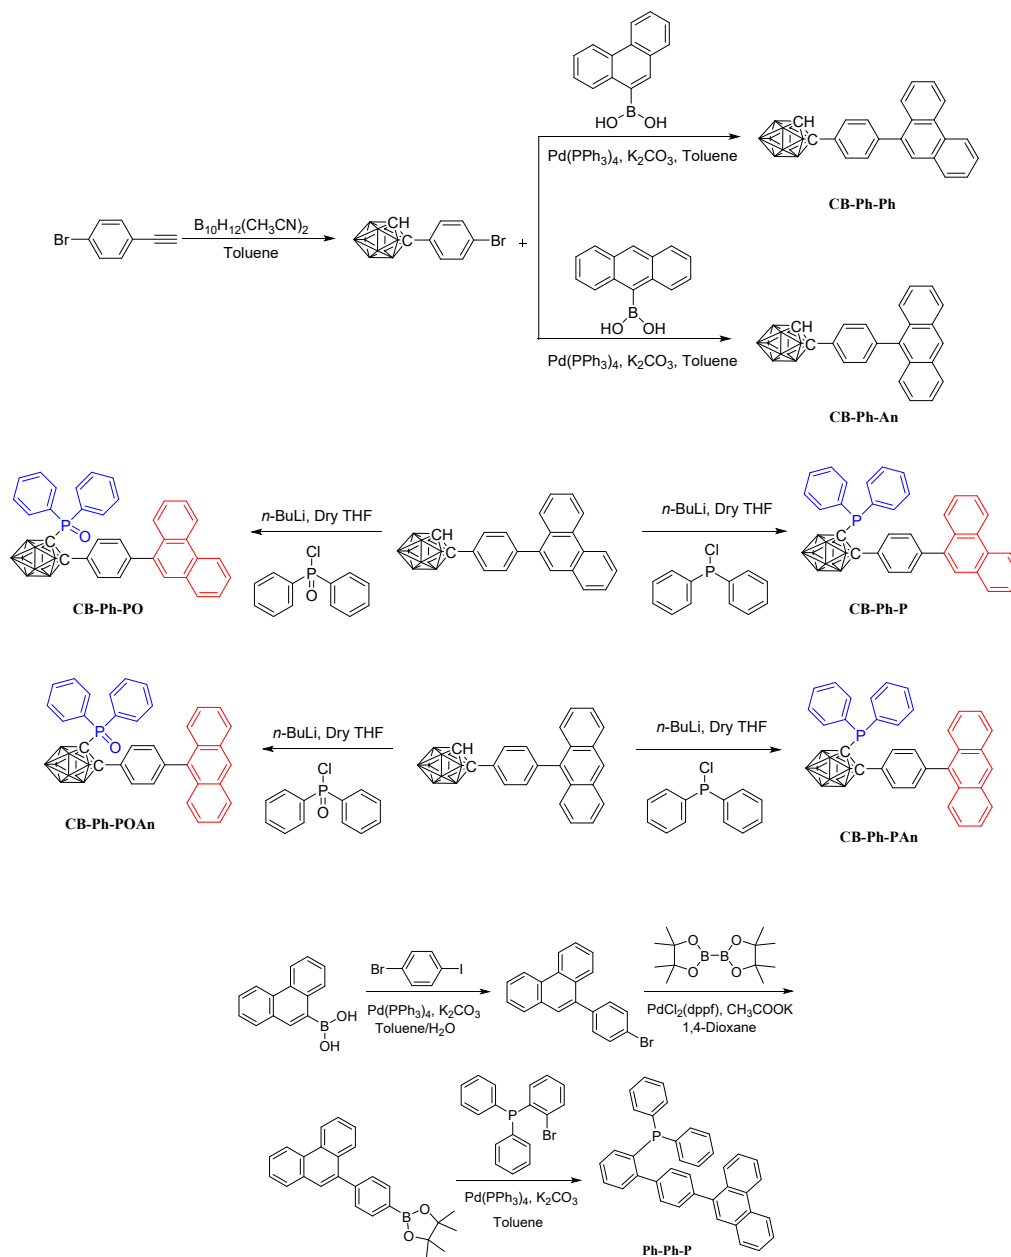

**Scheme S1** Synthesis routes for target compounds and **Ph-Ph-P**.

Synthesis of **CB-Ph-Ph**: The compound was synthesized according to the previous literature<sup>1</sup>. White solid, with a yield of 49%. <sup>1</sup>H NMR (400 MHz, Chloroform-*d*)  $\delta$  8.79 (d,  $J = 8.3$  Hz, 1H), 8.73 (d,  $J = 8.3$  Hz, 1H), 7.89 (dd,  $J = 7.9$ , 1.5 Hz, 1H), 7.82 (d,  $J = 8.2$  Hz, 1H), 7.76-7.66 (m, 2H), 7.66-7.59 (m, 4H), 7.59-7.47 (m, 3H), 4.06 (s, 1H), 3.15-1.87 (m, 10H, carborane-H).

Synthesis of **CB-Ph-An**: The compound was synthesized according to previous literature<sup>1</sup>. White solid, with a yield of 79%. <sup>1</sup>H NMR (500 MHz, Chloroform-*d*)  $\delta$

8.53 (s, 1H), 8.06 (ddt,  $J = 8.5, 1.3, 0.7$  Hz, 2H), 7.73-7.67 (m, 2H), 7.55 (dq,  $J = 8.9, 1.0$  Hz, 2H), 7.51-7.44 (m, 2H), 7.44-7.34 (m, 4H), 4.11 (s, 1H), 3.36-1.90 (m, 10H, carborane-H).

**Synthesis of CB-Ph-P:** To a solution of **CB-Ph-Ph** (90 mg, 0.2 mmol) in anhydrous THF was added *n*-BuLi (1.2 M, 2.4 mmol) dropwise at -78 °C and stirred for 2 h. Inject Chlorodiphenylphosphine and react for two hours. Add a drop of water to quench the reaction, dry with anhydrous Na<sub>2</sub>SO<sub>4</sub>. Remove the solvent by rotary evaporation under reduced pressure. The crude product was purified by silica gel column chromatography (pure PE) to give a white solid 103 mg, yield 78%. M.p.: 157.1 °C. <sup>1</sup>H NMR (400 MHz, Chloroform-*d*) δ 8.80 (dd,  $J = 26.1, 8.3$  Hz, 2H), 7.95 (dd,  $J = 7.5, 2.1$  Hz, 2H), 7.77-7.58 (m, 11H), 7.54 (d,  $J = 8.4$  Hz, 2H), 7.50-7.36 (m, 6H), 3.25-1.66 (m, 10H, carborane-H). <sup>13</sup>C NMR (101 MHz, Chloroform-*d*) δ 143.30, 137.34, 135.65, 135.38, 132.90, 132.75, 131.97, 131.40, 131.06, 130.78, 130.66, 130.29, 130.25, 130.20, 129.93, 128.83, 128.67, 128.57, 127.82, 127.12, 127.06, 126.78, 126.74, 126.50, 123.18, 122.66, 85.80, 85.62, 83.68, 82.96. <sup>11</sup>B NMR (128 MHz, Chloroform-*d*) δ -2.88 (3 B), -13.88 (7 B). <sup>31</sup>P NMR (162 MHz, Chloroform-*d*) δ 12.00. HRMS (ESI): *m/z*: [M+H]<sup>+</sup> Calcd for C<sub>34</sub>H<sub>33</sub>B<sub>10</sub>P: 581.3396 ; Found: 581.3392.

**Synthesis of CB-Ph-PO:** To a solution of **CB-Ph-Ph** in anhydrous THF was added *n*-BuLi (1.2 M, 2.4 mmol) dropwise at -78 °C and stirred for 2 h. Inject diphenylphosphinyl Chloride and react for two hours. Add a drop of water to quench the reaction, dry with anhydrous Na<sub>2</sub>SO<sub>4</sub>. Remove the solvent by rotary evaporation under reduced pressure. The crude product was purified by silica gel column chromatography (DCM: PE = 2: 1) to give a white solid of 455 mg, yield 58%. M.p.: 241.5 °C. <sup>1</sup>H NMR (500 MHz, Chloroform-*d*) δ 8.80 (dd,  $J = 8.4, 1.2$  Hz, 1H), 8.77-8.71 (m, 1H), 7.98-7.88 (m, 6H), 7.74-7.50 (m, 9H), 7.46 (td,  $J = 7.7, 3.8$  Hz, 4H), 7.38-7.32 (m, 2H), 3.75-1.76 (m, 10H, carborane-H). <sup>13</sup>C NMR (101 MHz, Chloroform-*d*) δ 143.16, 137.46, 133.11, 132.66, 132.59, 132.00, 131.46, 130.79, 130.63, 130.21, 129.67, 129.62, 129.58, 128.88, 128.75, 128.50, 128.40, 127.88, 127.86, 127.15, 127.08, 126.83, 126.79, 126.67, 123.19, 122.70, 85.31, 79.11, 78.67. <sup>11</sup>B NMR (128 MHz, Chloroform-*d*) δ -2.9 (2 B), -15.8 (8 B). <sup>31</sup>P NMR (202 MHz, Chloroform-*d*) δ 19.86. HRMS (ESI): *m/z*: [M+H]<sup>+</sup> Calcd for C<sub>34</sub>H<sub>33</sub>B<sub>10</sub>PO: 597.3345 ; Found: 597.3342.

**Synthesis of CB-Ph-PAn:** Following a similar procedure to **CB-Ph-P**. A white

solid was obtained with a yield of 68%. M.p. :237.2 °C. <sup>1</sup>H NMR (500 MHz, Chloroform-*d*) δ 8.54 (s, 1H), 8.08 (d, *J* = 8.6 Hz, 2H), 7.74-7.67 (m, 8H), 7.52-7.38 (m, 12H), 3.52-1.76 (m, 10H, carborane-H). <sup>13</sup>C NMR (126 MHz, Chloroform-*d*) δ 141.58, 135.69, 135.47, 135.40, 132.95, 132.83, 132.12, 131.44, 131.32, 131.17, 130.50, 130.46, 130.05, 128.78, 128.71, 128.67, 127.32, 126.37, 125.86, 125.38, 85.78, 85.64, 83.65, 83.08. <sup>11</sup>B NMR (160 MHz, Chloroform-*d*) δ - 2.00(2 B), - 4.43(2 B), - 10.87(6 B). <sup>31</sup>P NMR (202 MHz, Chloroform-*d*) δ 12.41. HRMS (ESI): *m/z*: [M+H]<sup>+</sup> Calcd for C<sub>34</sub>H<sub>33</sub>B<sub>10</sub>P: 581.3396 ; Found: 581.3404.

Synthesis of **CB-Ph-POAn**: Following a similar procedure to **CB-Ph-PO**. A white solid was obtained with a yield of 86%. M.p. :279.1 °C. <sup>1</sup>H NMR (500 MHz, Chloroform-*d*) δ 8.52 (s, 1H), 8.06 (d, *J* = 8.5 Hz, 2H), 8.02-7.94 (m, 4H), 7.70 (d, *J* = 8.8 Hz, 2H), 7.60-7.53 (m, 4H), 7.48 (dt, *J* = 8.9, 5.6 Hz, 6H), 7.40 (ddd, *J* = 8.2, 6.5, 1.3 Hz, 2H), 7.26 (d, *J* = 8.7 Hz, 2H), 3.85-1.68 (m, 10H, carborane-H). <sup>13</sup>C NMR (126 MHz, Chloroform-*d*) δ 141.36, 135.48, 133.21, 133.18, 132.68, 132.61, 132.06, 131.40, 130.91, 129.98, 129.74, 128.87, 128.55, 128.45, 127.17, 126.52, 125.76, 125.34, 85.40, 79.07, 78.64. <sup>11</sup>B NMR (160 MHz, Chloroform-*d*) δ 0.35(2 B), -3.14(2 B), -10.61(6 B). <sup>31</sup>P NMR (202 MHz, Chloroform-*d*) δ 20.29. HRMS (ESI): *m/z*: [M+H]<sup>+</sup> Calcd for C<sub>34</sub>H<sub>33</sub>B<sub>10</sub>P: 597.3345 ; Found: 597.3354.

Synthesis of **Ph-Ph-P**: (2-bromophenyl) diphenylphosphine (273 mg, 0.8 mmol), phenanthrene-9-ylboronic acid (400 mg, 1.1 mmol), K<sub>2</sub>CO<sub>3</sub> (310 mg, 2.2 mmol) and Pd(PPh<sub>3</sub>)<sub>4</sub> (92 mg, 0.1 mmol) were added to a 150 mL three-necked flask, and the Schlenk technique was used to deoxygenate. The temperature was raised to 80 °C, and the reaction was carried out for 24 hours. After post-treatment, the mixture was extracted twice with dichloromethane, extracted once with saturated brine, and dried over anhydrous Na<sub>2</sub>SO<sub>4</sub>. The solvent was removed under reduced pressure, 100-200 mesh silica gel column chromatography. A white solid was obtained with a yield of 35%. <sup>1</sup>H NMR (500 MHz, Chloroform-*d*) δ 8.78 (dd, *J* = 27.1, 8.2 Hz, 2H), 7.94 (dd, *J* = 11.8, 7.9 Hz, 2H), 7.77-7.57 (m, 5H), 7.53-7.31 (m, 17H), 7.15 (dd, *J* = 7.8, 3.9 Hz, 1H). <sup>13</sup>C NMR (126 MHz, Chloroform-*d*) δ 147.87, 147.66, 140.84, 139.58, 138.70, 137.57, 137.48, 136.52, 136.40, 134.37, 134.21, 133.98, 131.73, 131.26, 130.76, 130.38, 130.35, 130.07, 129.83, 129.79, 129.44, 128.87, 128.82, 128.75, 128.60, 128.55, 127.67, 127.58, 127.23, 126.98, 126.69, 126.58, 123.01, 122.68. <sup>31</sup>P NMR (202 MHz, Chloroform-*d*) δ -11.28. HRMS (ESI): *m/z*: [M+H]<sup>+</sup> Calcd for C<sub>38</sub>H<sub>27</sub>P: 515.1923 ; Found: 515.1927.

## II. Crystal data

**Table S1** A summary of crystallographic data of target compounds.

| Name                                                 | P-crystal                                         | O-crystal                                         | CB-Ph-PO                                           | CB-Ph-POAn                                         |
|------------------------------------------------------|---------------------------------------------------|---------------------------------------------------|----------------------------------------------------|----------------------------------------------------|
| Formula                                              | C <sub>34</sub> H <sub>33</sub> B <sub>10</sub> P | C <sub>34</sub> H <sub>33</sub> B <sub>10</sub> P | C <sub>34</sub> H <sub>33</sub> B <sub>10</sub> OP | C <sub>34</sub> H <sub>33</sub> B <sub>10</sub> OP |
| Radiation                                            | MoK $\alpha$<br>( $\lambda = 0.71073$ )           | MoK $\alpha$<br>( $\lambda = 0.71073$ )           | MoK $\alpha$<br>( $\lambda = 0.71073$ )            | MoK $\alpha$<br>( $\lambda = 0.71073$ )            |
| Formula weight                                       | 580.86                                            | 580.86                                            | 596.67                                             | 596.67                                             |
| Temperature(K)                                       | 296.15                                            | 296.15                                            | 296.15                                             | 296.15                                             |
| Crystal system                                       | triclinic                                         | monoclinic                                        | triclinic                                          | triclinic                                          |
| Space group                                          | <i>P</i> -1                                       | <i>C</i> 2/ <i>c</i>                              | <i>P</i> -1                                        | <i>P</i> -1                                        |
| <i>a</i> (Å)                                         | 8.615(5)                                          | 20.073(10)                                        | 11.424(14)                                         | 11.4493(12)                                        |
| <i>b</i> (Å)                                         | 11.155(6)                                         | 22.990(10)                                        | 13.228(17)                                         | 12.8915(14)                                        |
| <i>c</i> (Å)                                         | 17.890(11)                                        | 16.078(7)                                         | 13.267(15)                                         | 13.2464(14)                                        |
| $\alpha$ (°)                                         | 80.41(3)                                          | 90                                                | 117.72(6)                                          | 63.033(3)                                          |
| $\beta$ (°)                                          | 79.43(3)                                          | 113.578(14)                                       | 97.28(7)                                           | 88.703(4)                                          |
| $\gamma$ (°)                                         | 67.43(3)                                          | 90                                                | 91.11(8)                                           | 76.711(4)                                          |
| Volume(Å <sup>3</sup> )                              | 1551.9(16)                                        | 6801(5)                                           | 1753(4)                                            | 1688.4(3)                                          |
| Z                                                    | 2                                                 | 116                                               | 2                                                  | 2                                                  |
| Density(g/cm <sup>3</sup> )                          | 1.243                                             | 1.205                                             | 1.130                                              | 1.291                                              |
| $\mu$ /mm <sup>-1</sup>                              | 0.114                                             | 0.109                                             | 0.105                                              | 0.230                                              |
| <i>F</i> (000)                                       | 604.5                                             | 2577.6                                            | 620.0                                              | 678.9                                              |
| R <sub>1</sub> ( <i>I</i> >2 $\sigma$ ( <i>I</i> ))  | 0.0474                                            | 0.0477                                            | 0.0696                                             | 0.0518                                             |
| wR <sub>2</sub> ( <i>I</i> >2 $\sigma$ ( <i>I</i> )) | 0.1042                                            | 0.1128                                            | 0.1629                                             | 0.1205                                             |
| GOOF                                                 | 1.0573                                            | 1.024                                             | 1.050                                              | 1.044                                              |

**Table S2** The photophysical properties of target compounds.

| Sample                   | $\lambda_{\text{ex}}$ <sup>[a]</sup><br>(nm) | $\lambda_{\text{em}}$ <sup>[a]</sup><br>(nm) | $\tau_{\text{F}}$ <sup>[a]</sup><br>(ns) | $\Phi_{\text{F}}$ <sup>[e]</sup><br>(%) |                     |                      |
|--------------------------|----------------------------------------------|----------------------------------------------|------------------------------------------|-----------------------------------------|---------------------|----------------------|
|                          |                                              |                                              |                                          | Sol <sup>[b]</sup>                      | Agg <sup>[c]</sup>  | Solid <sup>[a]</sup> |
| <b>P-crystal</b>         | 387                                          | 426                                          | 0.72                                     | n.d. <sup>[d]</sup>                     | n.d. <sup>[d]</sup> | 0.6                  |
| <b>O-crystal</b>         | 356                                          | 596                                          | 4.54                                     | n.d. <sup>[d]</sup>                     | n.d. <sup>[d]</sup> | 3.3                  |
| <b>Recrystallization</b> | 367                                          | 423                                          | 0.799                                    | n.d. <sup>[d]</sup>                     | n.d. <sup>[d]</sup> | <0.1                 |
| <b>ground-1</b>          | 364                                          | 608                                          | 3.96                                     | n.d. <sup>[d]</sup>                     | n.d. <sup>[d]</sup> | 3.5                  |
| <b>CB-Ph-P</b>           | 373                                          | 421                                          | 1.03                                     | n.d. <sup>[d]</sup>                     | 3.28                | 4.5                  |
| <b>CB-Ph-PO</b>          | 388                                          | 624                                          | 11..13                                   | n.d. <sup>[d]</sup>                     | 26.57               | 65.3                 |
| <b>CB-Ph-PAn</b>         | 258                                          | 393                                          | 1.91                                     | n.d. <sup>[d]</sup>                     | 2.92                | 1.3                  |
| <b>ground-2</b>          | 417                                          | 623                                          | 3.66                                     | n.d. <sup>[d]</sup>                     | n.d. <sup>[d]</sup> | n.d. <sup>[d]</sup>  |
| <b>CB-Ph-POAn</b>        | 373                                          | 672                                          | 4.42                                     | n.d. <sup>[d]</sup>                     | 3.71                | 5.4                  |

[a] In the amorphous state. [b] Measured in THF solution (10<sup>-5</sup> mol L<sup>-1</sup>) at room temperature. [c]  $f_{\text{w}} = 99\%$ . [d] Not detected. [e] Determined as a fluorescence quantum efficiency.

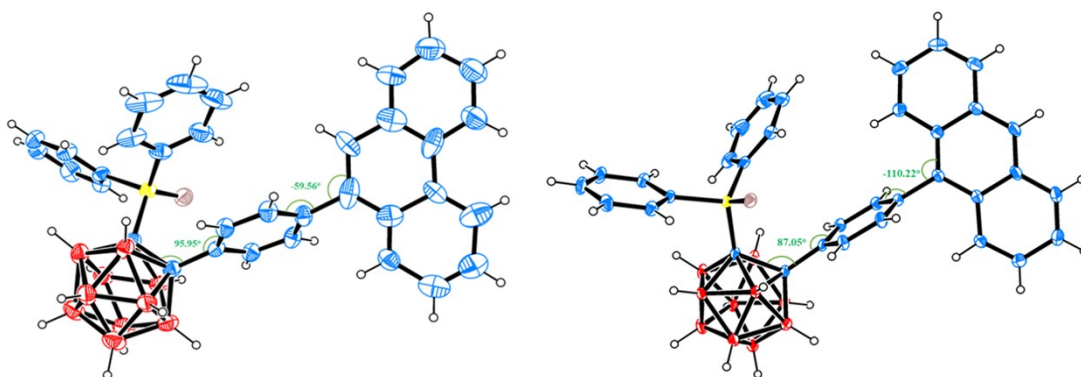

**Figure S1** ORTEP diagram (30% probability level) of **CB-Ph-PO** (left) and **CB-Ph-POAn** (right).

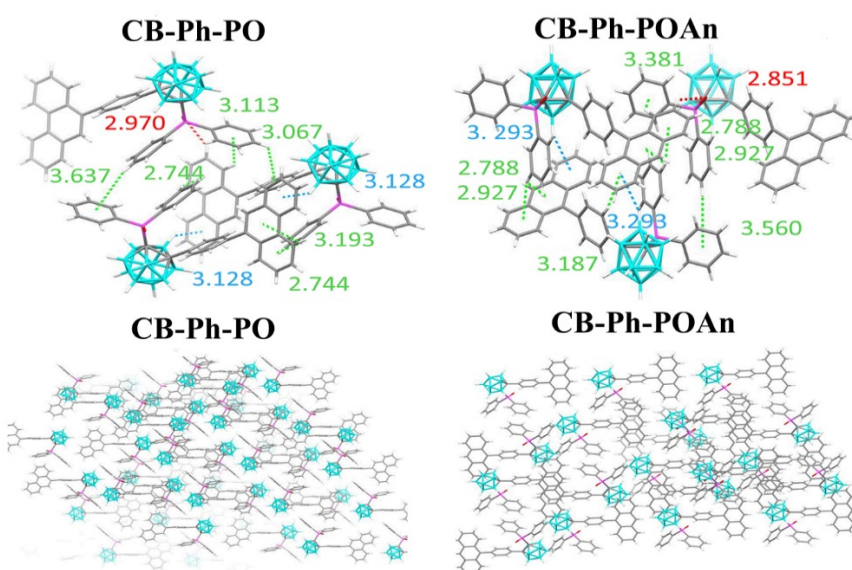

**Figure S2** The intermolecular interactions between adjacent molecules in **CB-Ph-PO** and **CB-Ph-POAn**.

### III. Photophysical Properties.

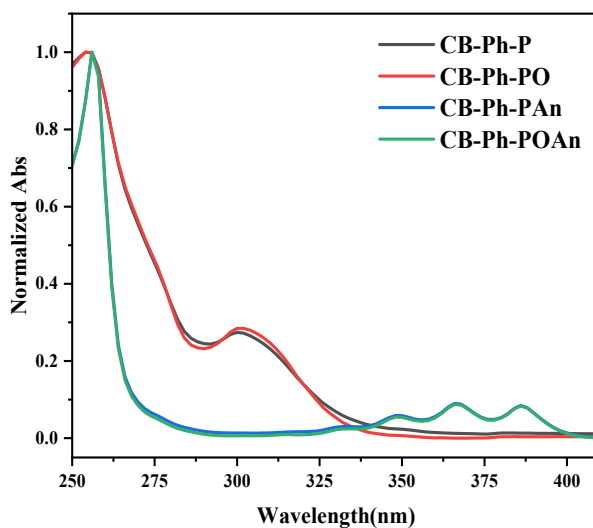

**Figure S3** UV–vis absorption spectra of **CB-Ph-P**, **CB-Ph-PO**, **CB-Ph-PAn** and **CB-Ph-POAn** in THF solution ( $1 \times 10^{-5}$  mol L<sup>-1</sup>).

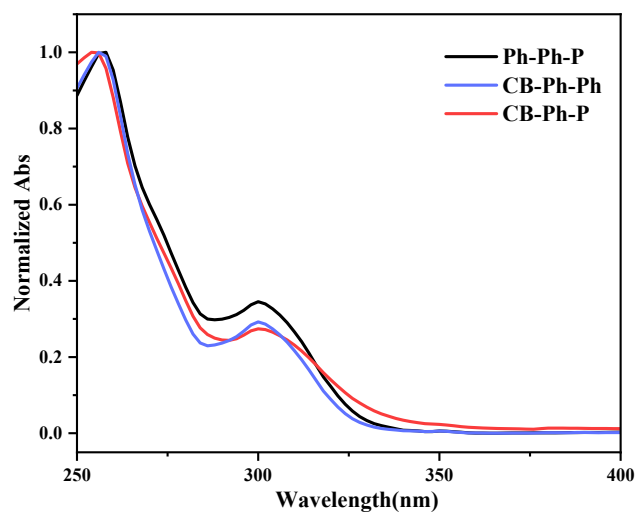

**Figure S4** UV–vis absorption spectra of **CB-Ph-P**, **CB-Ph-Ph**, **Ph-Ph-P** in THF solution ( $1 \times 10^{-5}$  mol L<sup>-1</sup>).

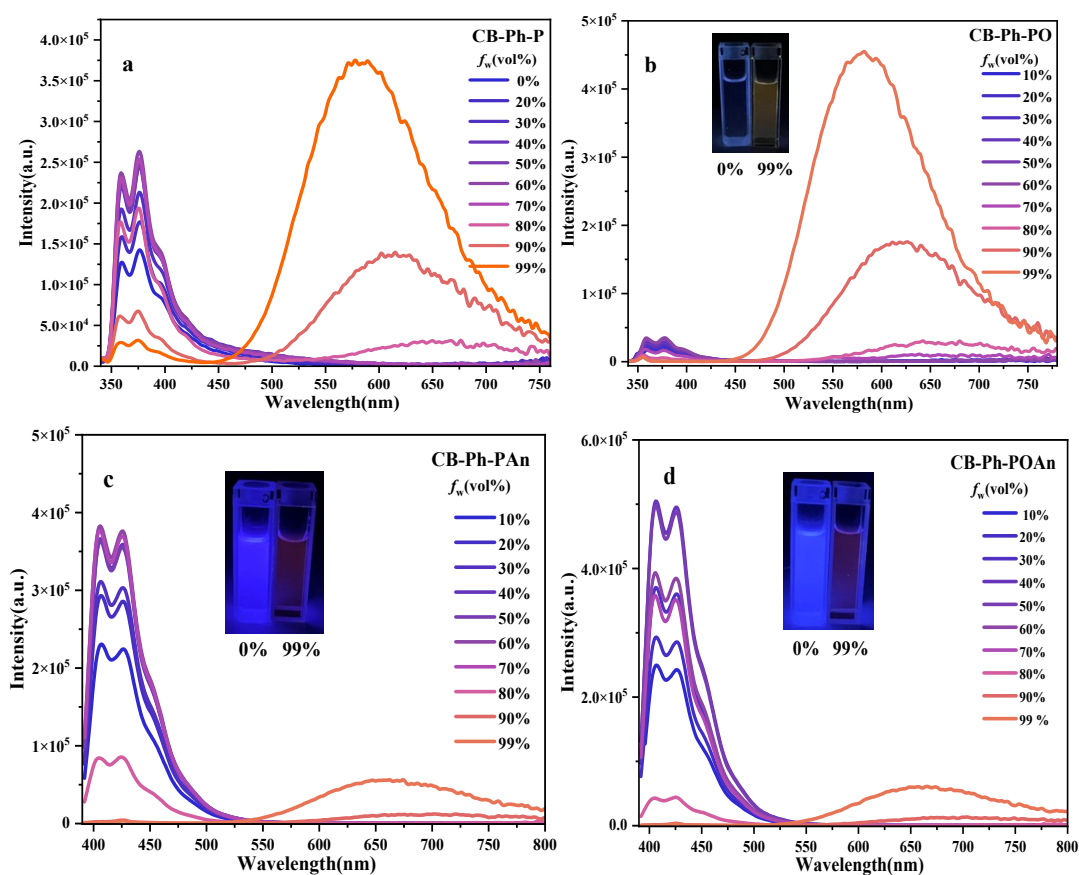

**Figure S5** Fluorescence emission spectra of (a) **CB-Ph-P**; (b) **CB-Ph-PO**; (c) **CB-Ph-PAn**; (d) **CB-Ph-POAn** in THF and H<sub>2</sub>O solvents with different water fractions.



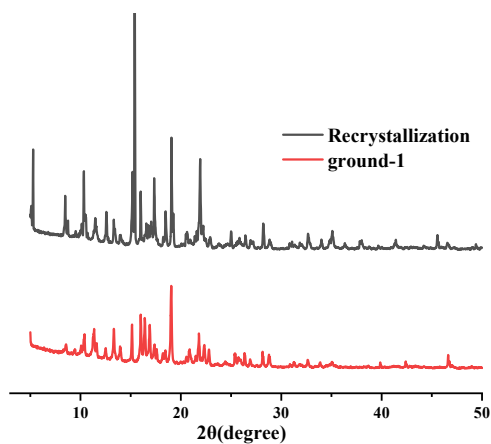

**Figure S6** The PXRD diagram of the original and ground for the recrystallized solid of CB-Ph-P.

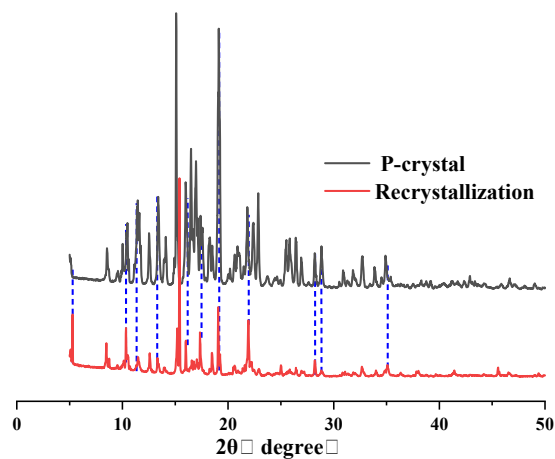

**Figure S7** The PXRD diagram of the P-crystal and the recrystallized solid.

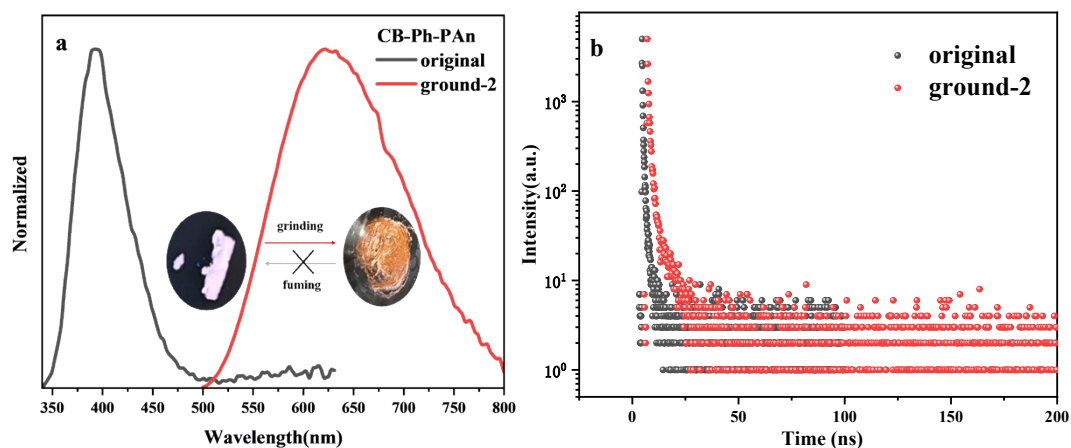

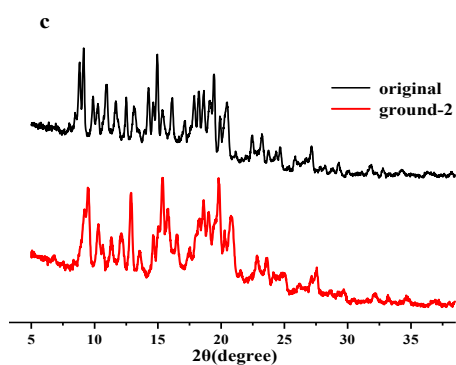

**Figure S8** (a) Fluorescence spectra; (b) lifetime; (c) PXRD of the original sample and the ground sample for **CB-Ph-PAn**.

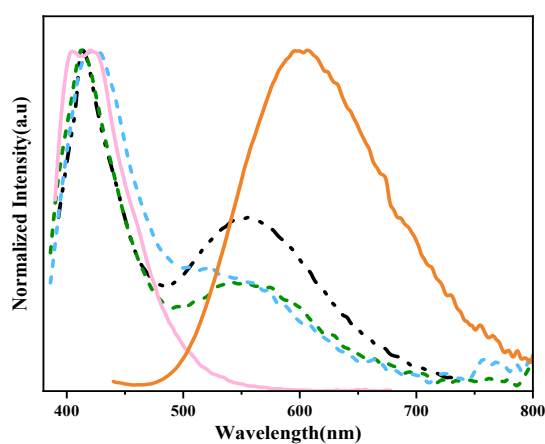

**Figure S9** The recrystallized solid (solid pink line) and the O-crystal (solid orange line) emission spectra of **CB-Ph-P**; the crystal state (black dashed line); the ground sample (green dashed line) and the amorphous powder state sample (blue dashed line) emission spectra of **CB-Ph-Ph**.

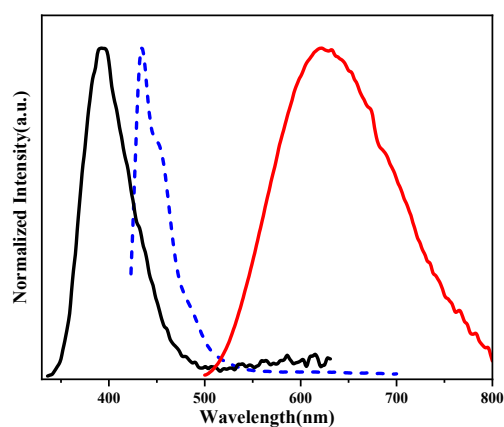

**Figure S10** The powdered state (solid black line) and the ground sample(solid red line) emission spectra of **CB-Ph-PAn**, the amorphous powder state sample (blue dashed line) emission spectra of **CB-Ph-An**.

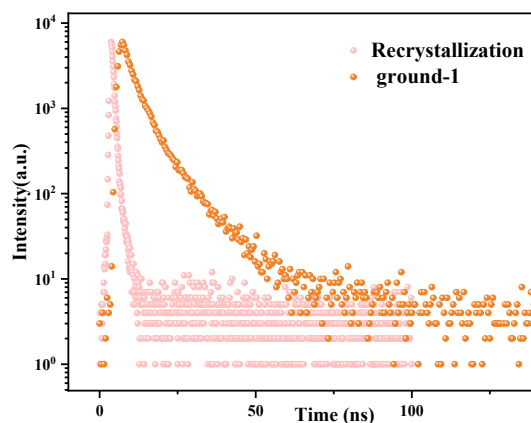

**Figure S11** Fluorescence lifetime of the recrystallized solid and the ground sample for CB-Ph-P.

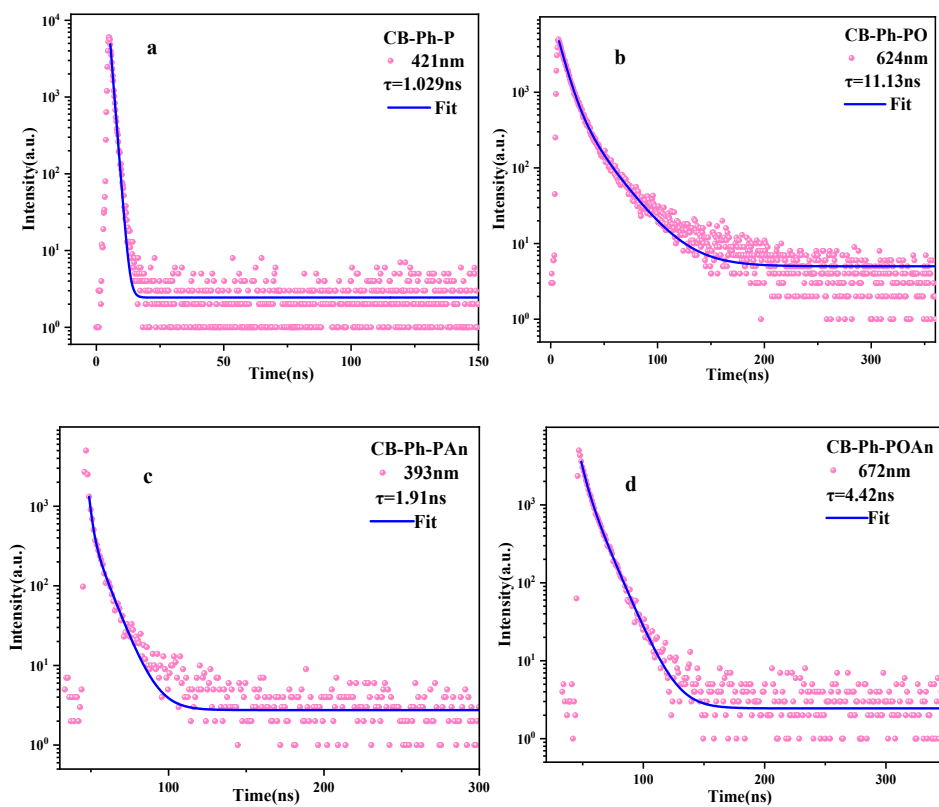

**Figure S12** The fluorescence lifetime of **CB-Ph-P** (a); **CB-Ph-PO** (b); **CB-Ph-PAN** (c) and **CB-Ph-POAn** (d).

## IV. NMR spectra and HRMS of new compounds

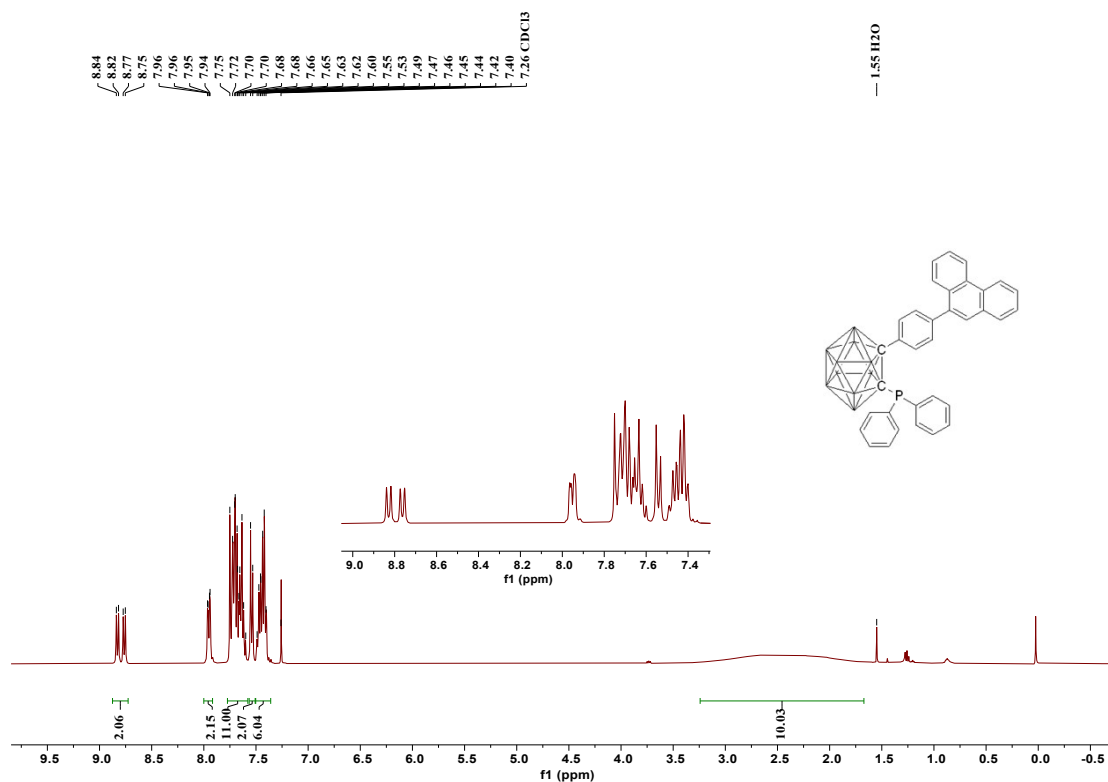

**Figure S13**  $^1\text{H}$  NMR spectrum of **CB-Ph-P** in  $\text{CDCl}_3$ .

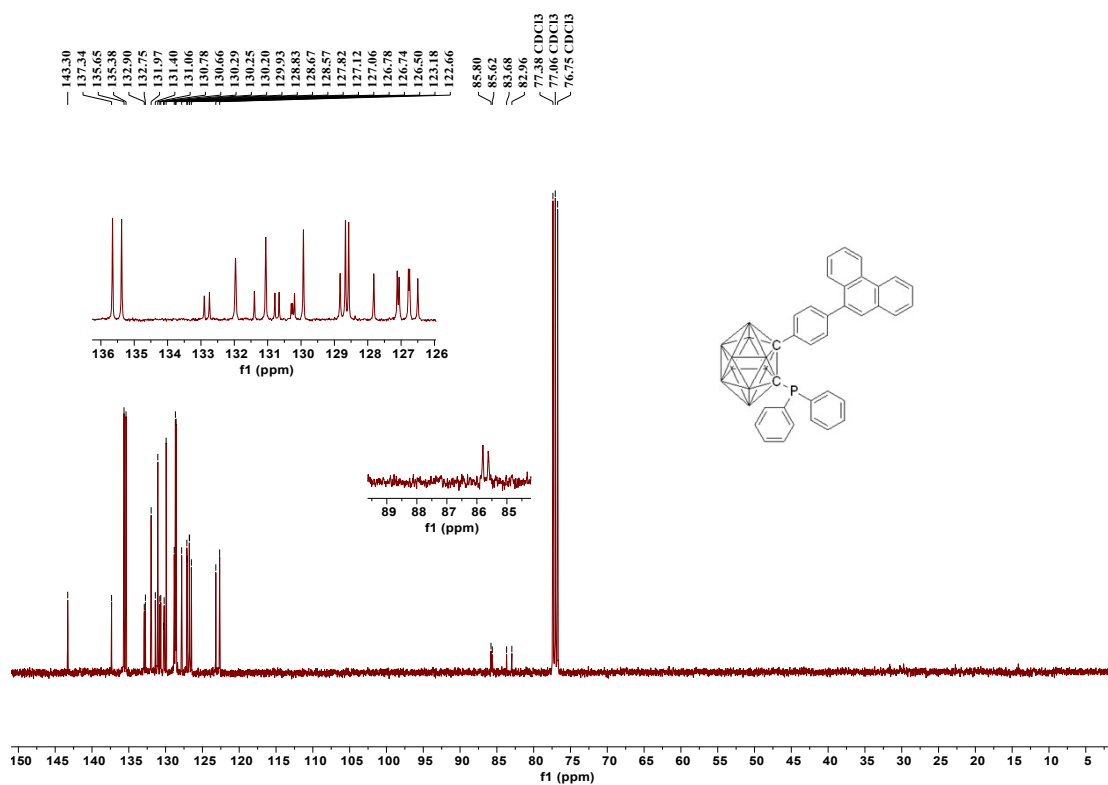

**Figure S14**  $^{13}\text{C}$  NMR spectrum of **CB-Ph-P** in  $\text{CDCl}_3$ .

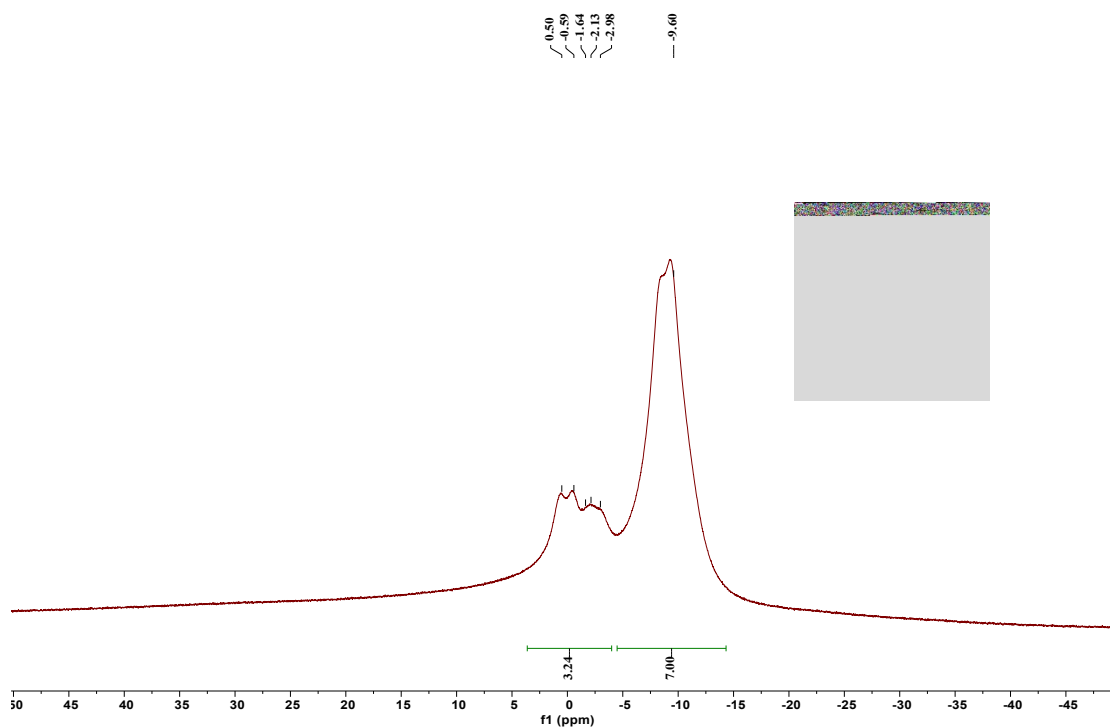

Figure S15  $^{11}\text{B}$  NMR spectrum of **CB-Ph-P** in  $\text{CDCl}_3$ .

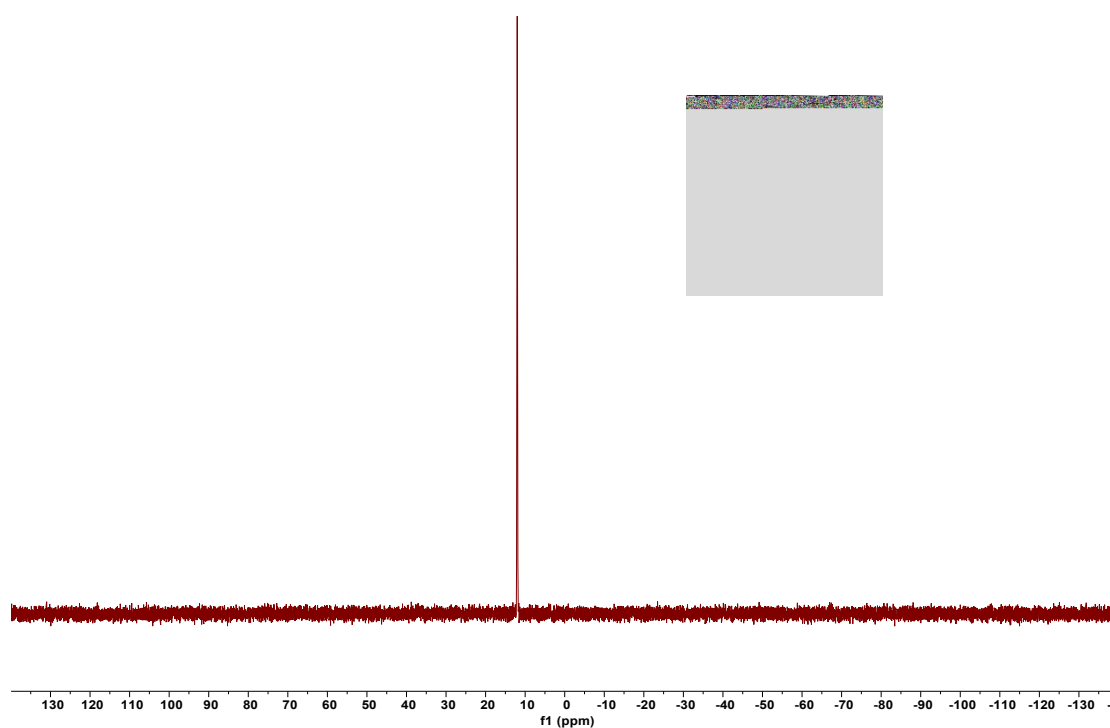

Figure S16  $^{31}\text{P}$  NMR spectrum of **CB-Ph-P** in  $\text{CDCl}_3$ .

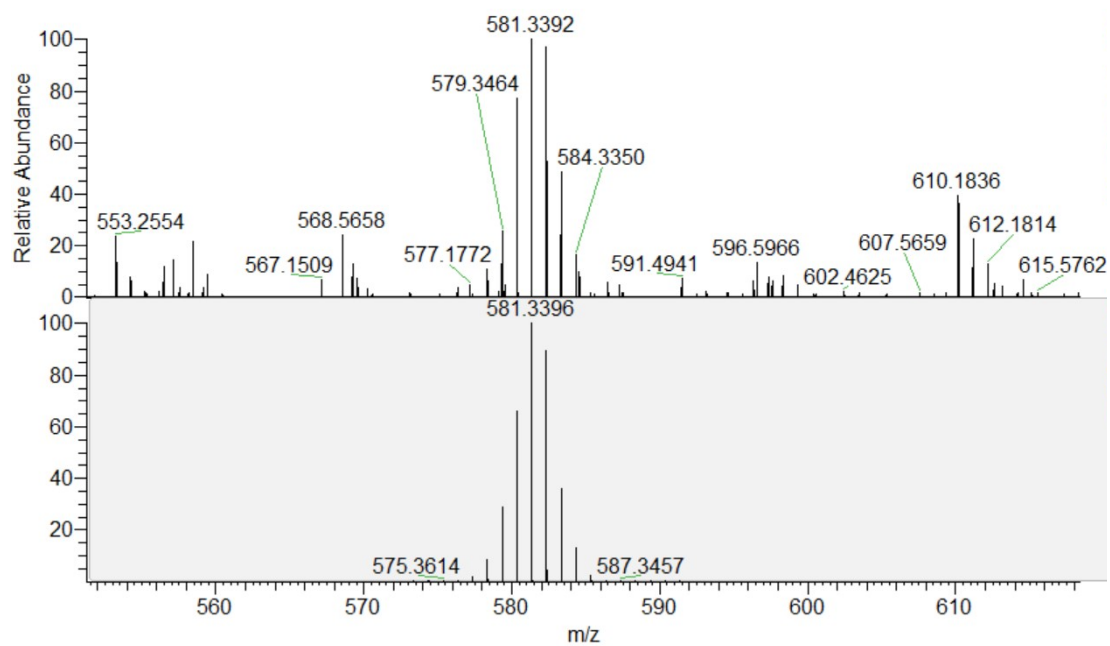

Figure S17 HRMS spectrum of CB-Ph-P.

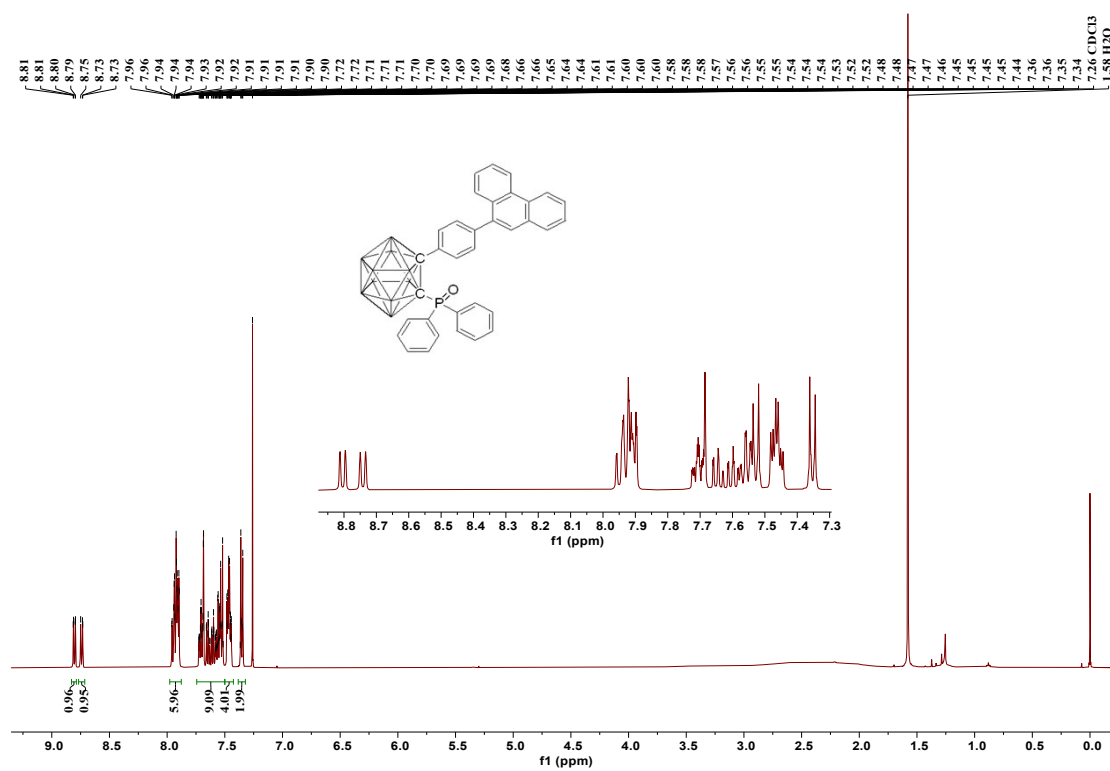

Figure S18 <sup>1</sup>H NMR spectrum of CB-Ph-PO in CDCl<sub>3</sub>.

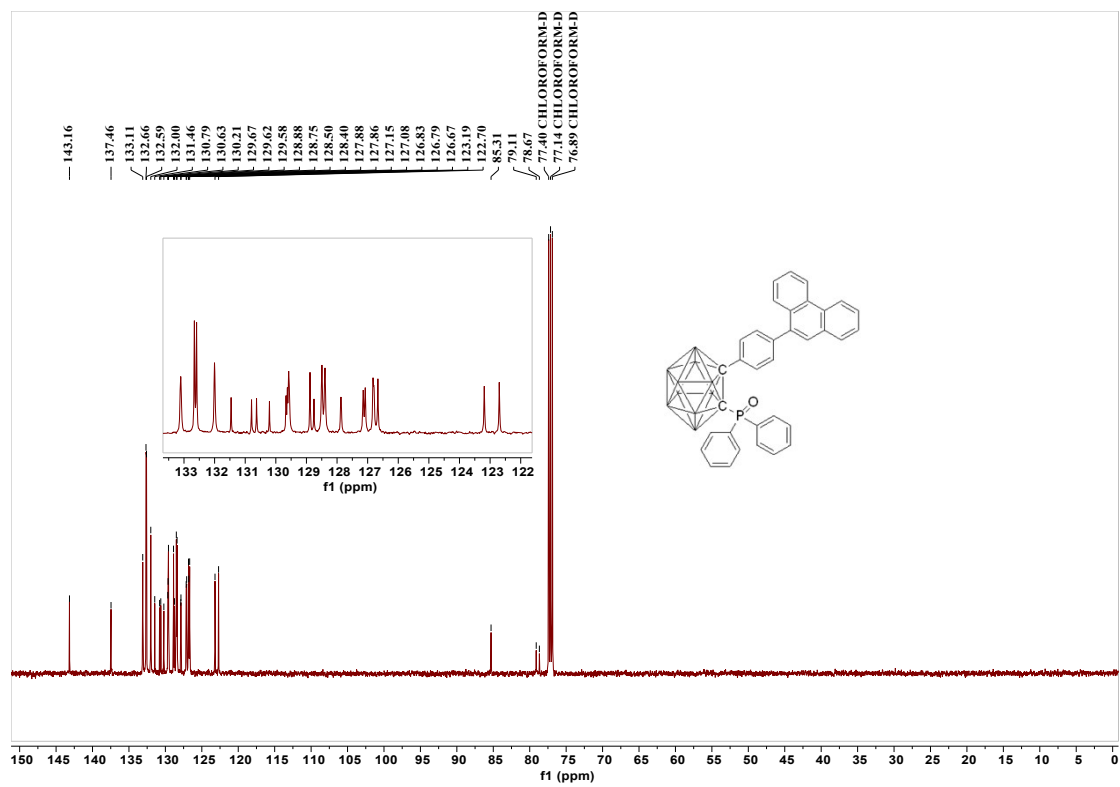

Figure S19  $^{13}\text{C}$  NMR spectrum of CB-Ph-PO in  $\text{CDCl}_3$ .

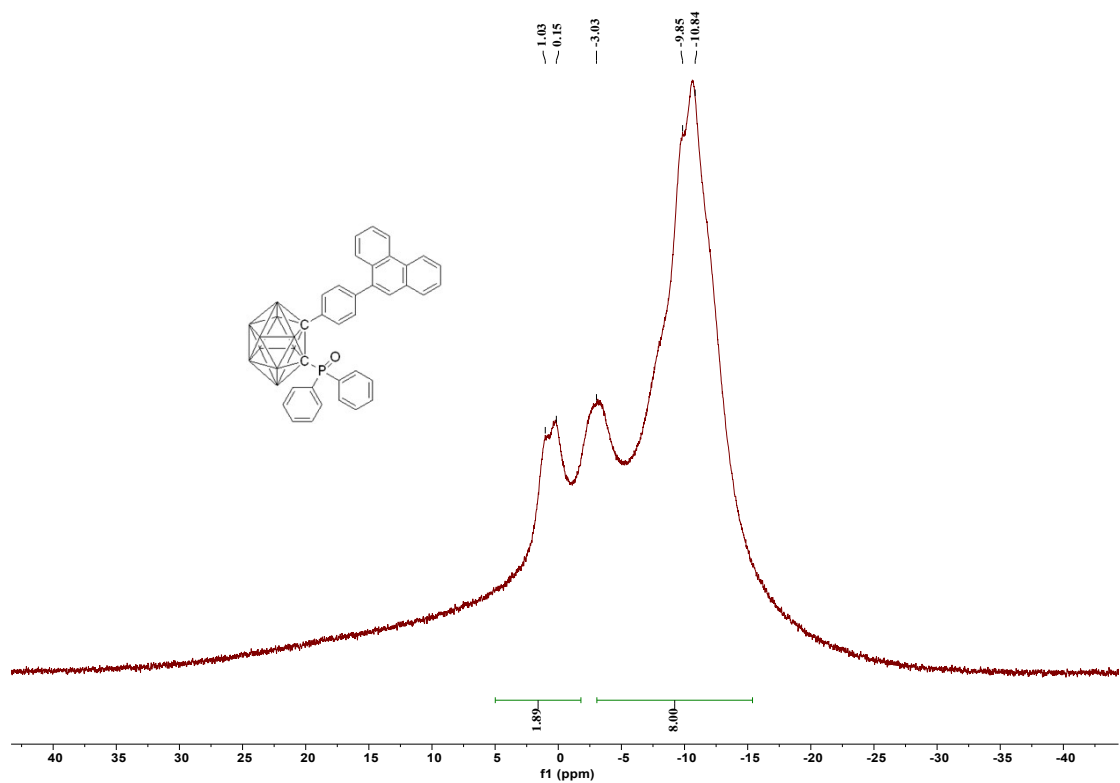

Figure S20  $^{11}\text{B}$  NMR spectrum of CB-Ph-PO in  $\text{CDCl}_3$ .

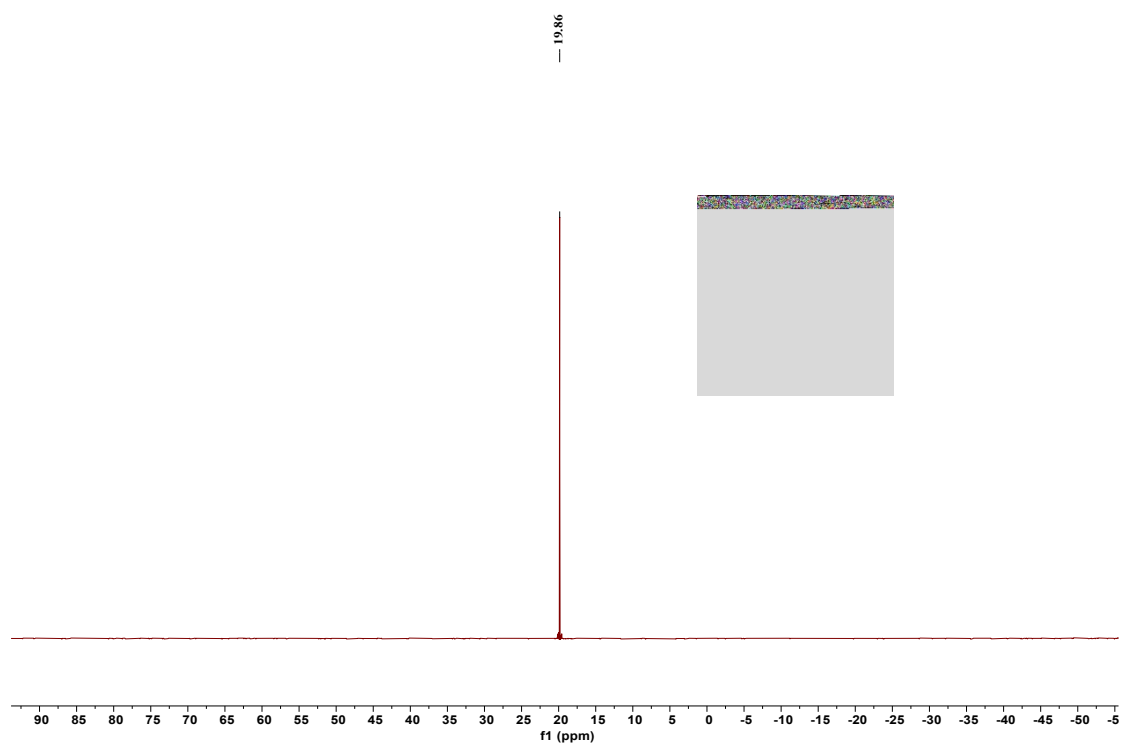

**Figure S21**  $^{31}\text{P}$  NMR spectrum of **CB-Ph-PO** in  $\text{CDCl}_3$ .

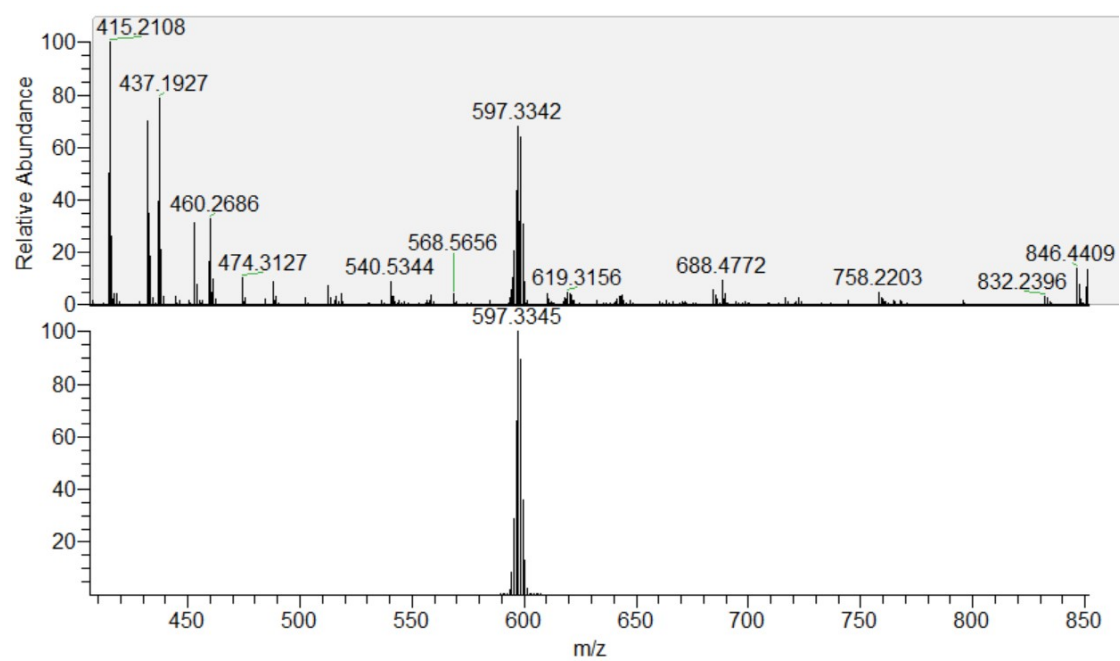

**Figure S22** HRMS spectrum of **CB-Ph-PO**.



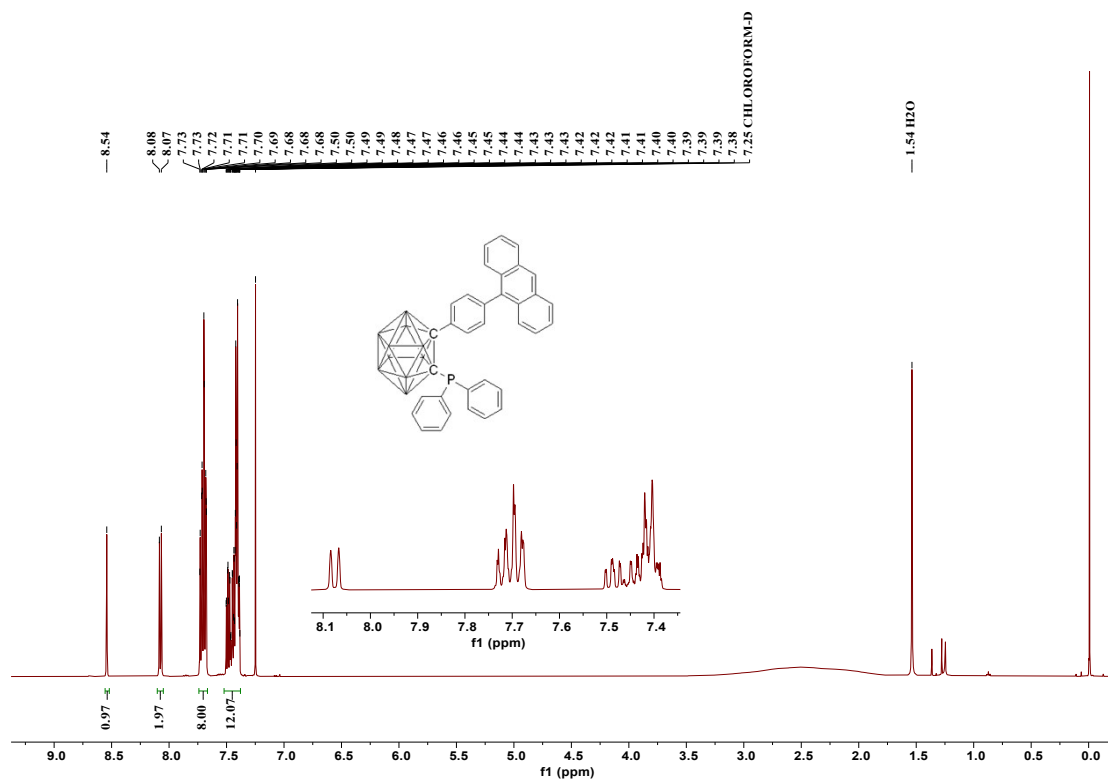

Figure S23 <sup>1</sup>H NMR spectrum of CB-Ph-PAn in CDCl<sub>3</sub>.

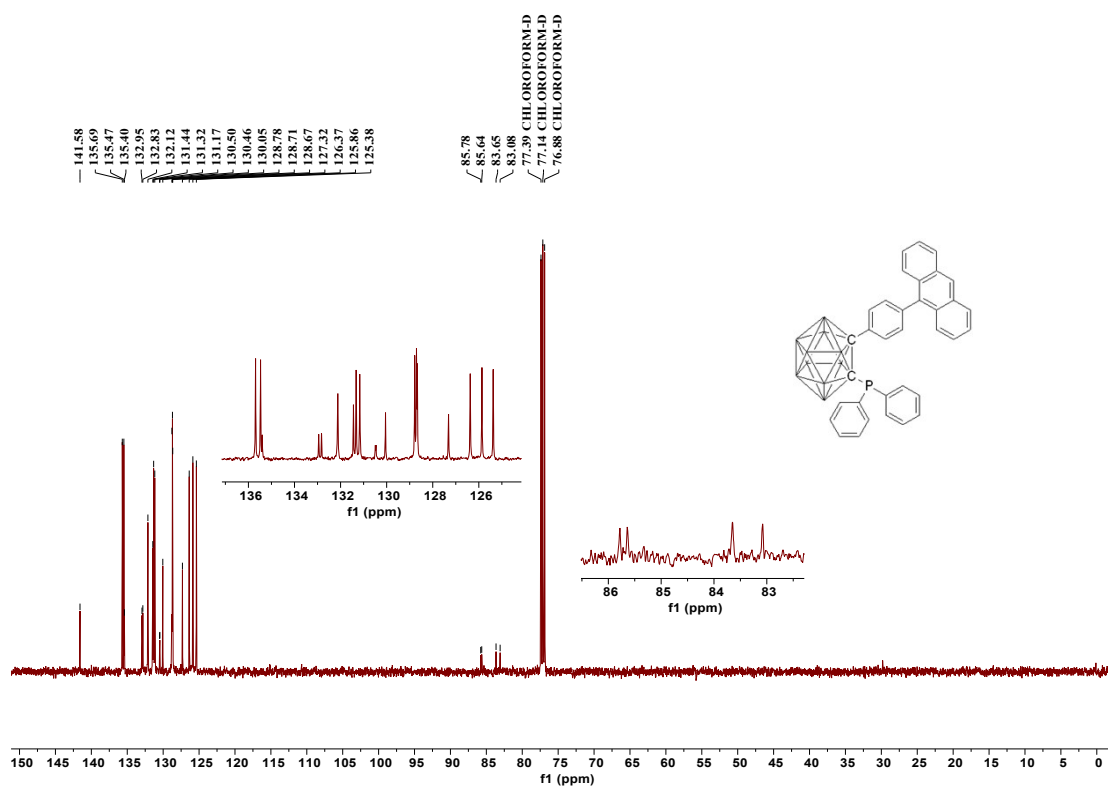

Figure S24 <sup>13</sup>C NMR spectrum of CB-Ph-PAn in CDCl<sub>3</sub>.

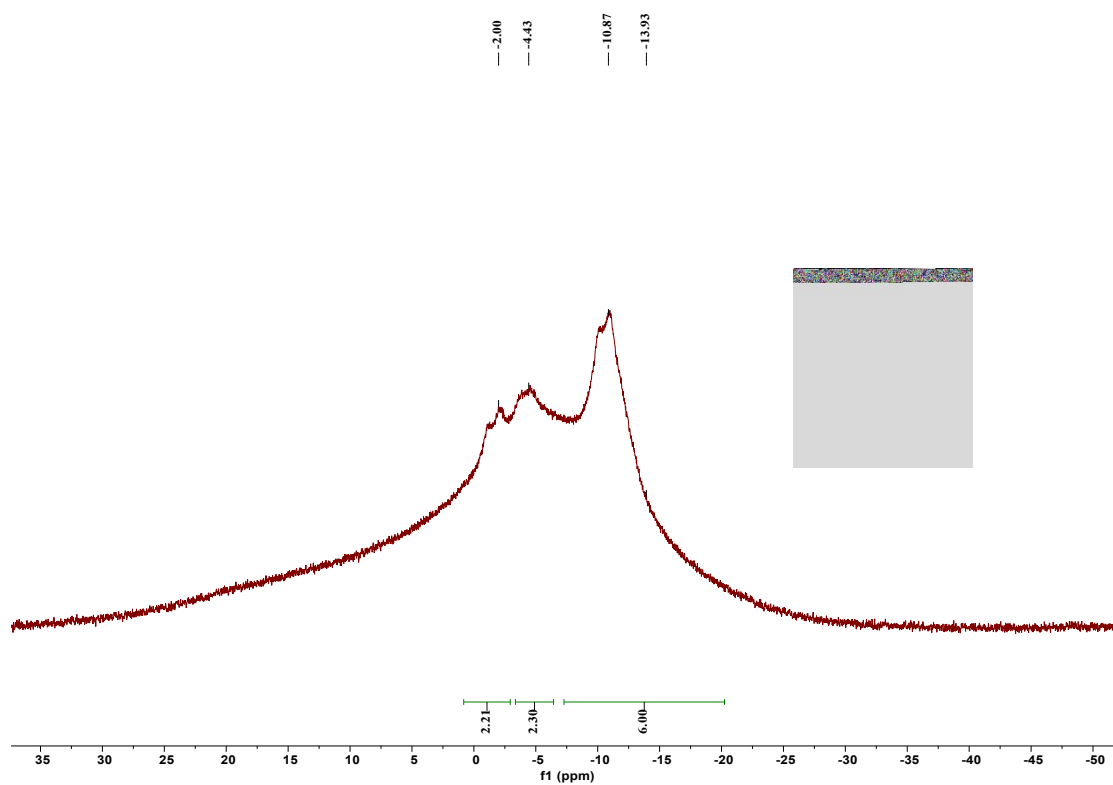

Figure 25  $^{11}\text{B}$  NMR spectrum of **CB-Ph-PAn** in  $\text{CDCl}_3$ .

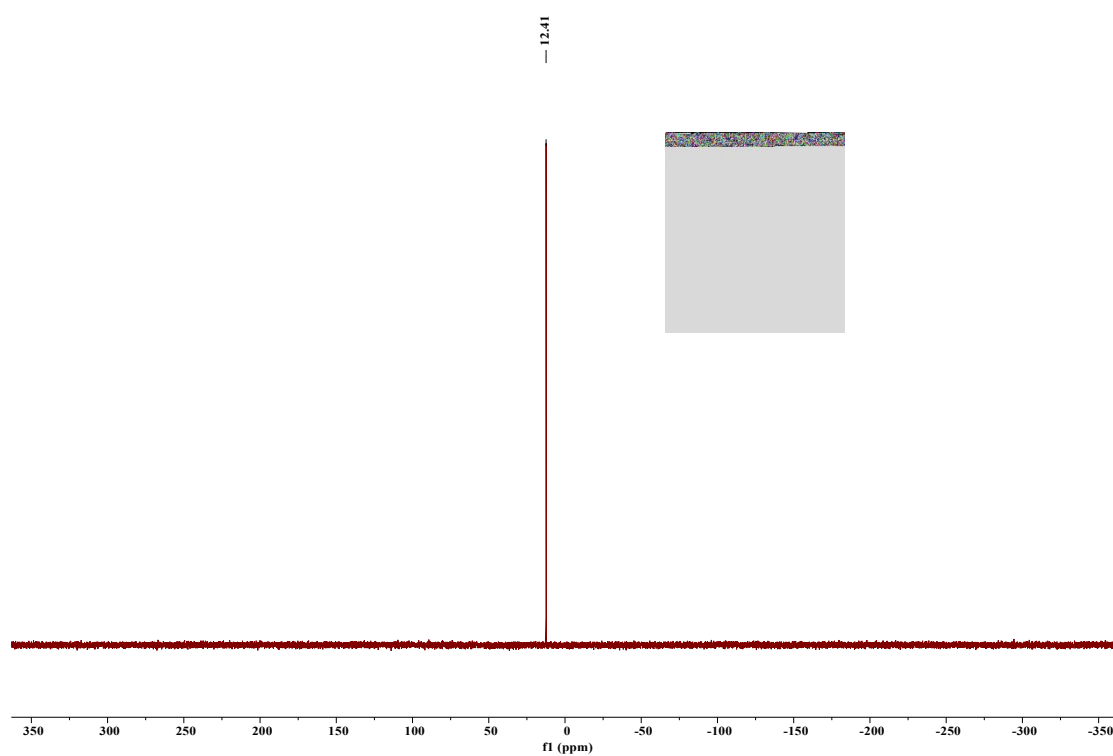

Figure S26  $^{31}\text{P}$  NMR spectrum of **CB-Ph-PAn** in  $\text{CDCl}_3$ .

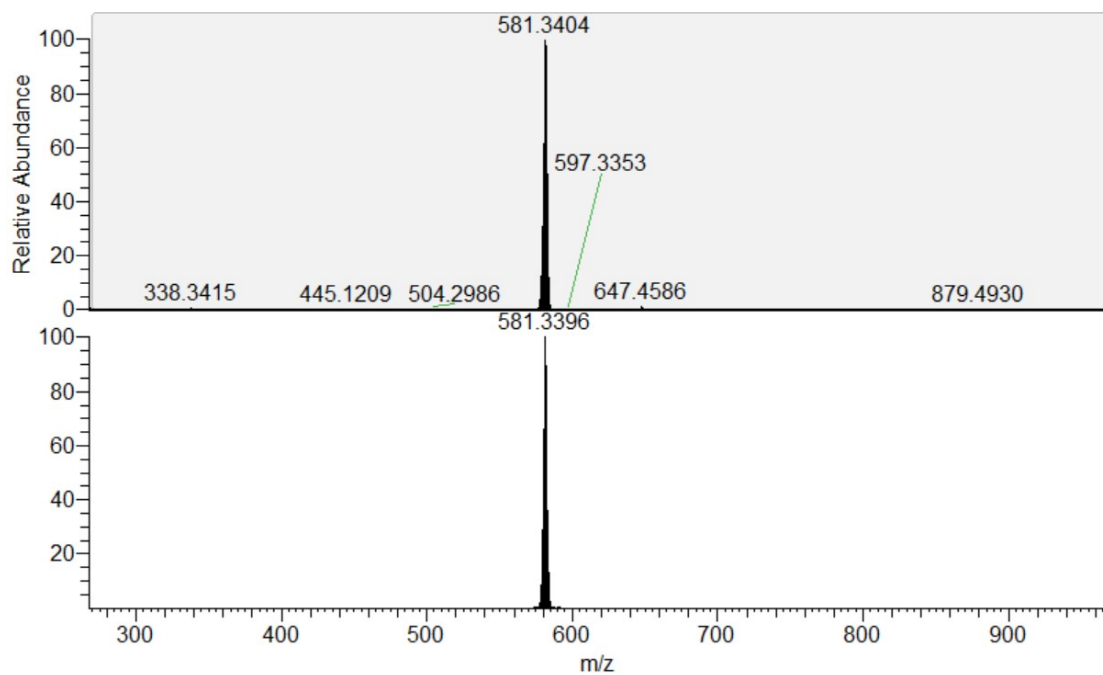

Figure S27 HRMS spectrum of CB-Ph-PAn.

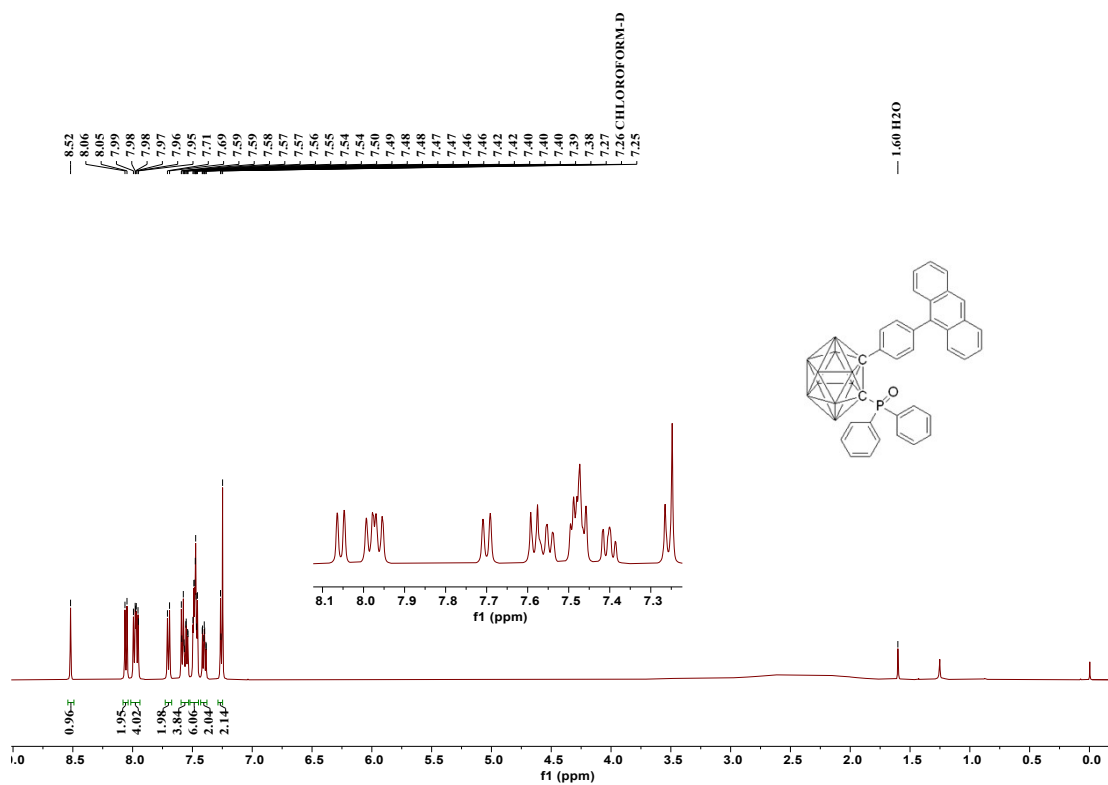

Figure S28 <sup>1</sup>H NMR spectrum of CB-Ph-POAn in CDCl<sub>3</sub>.

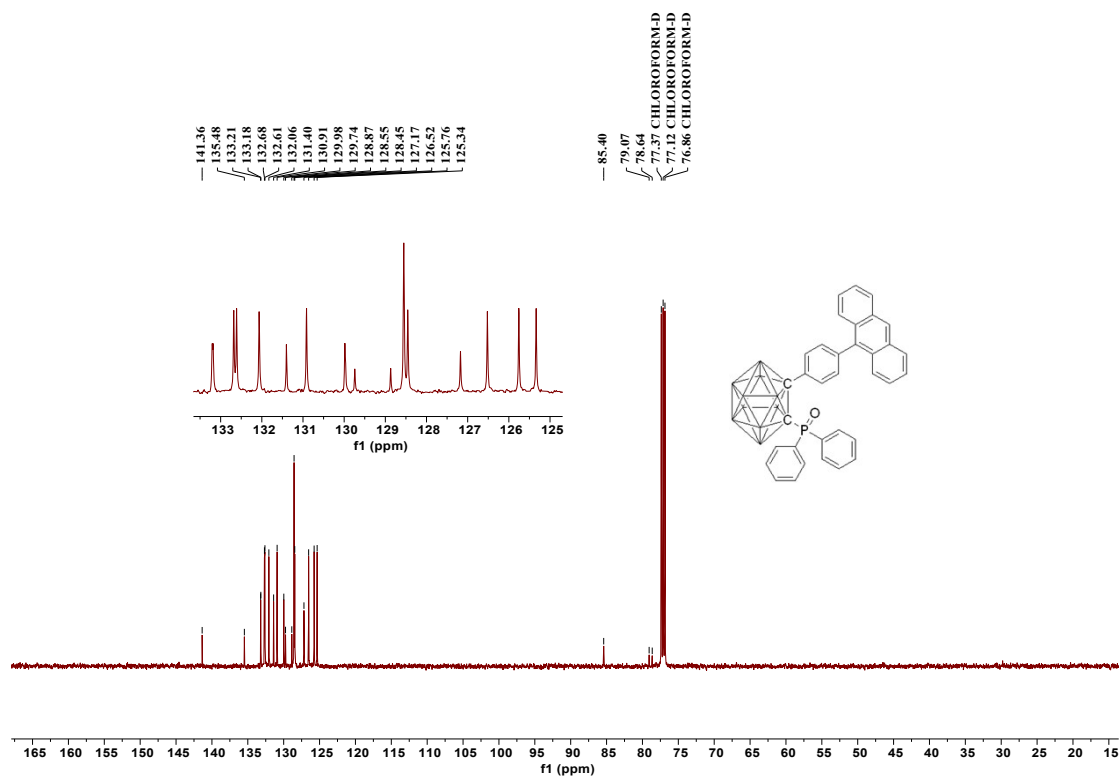

Figure S29  $^{13}\text{C}$  NMR spectrum of **CB-Ph-POAn** in  $\text{CDCl}_3$ .

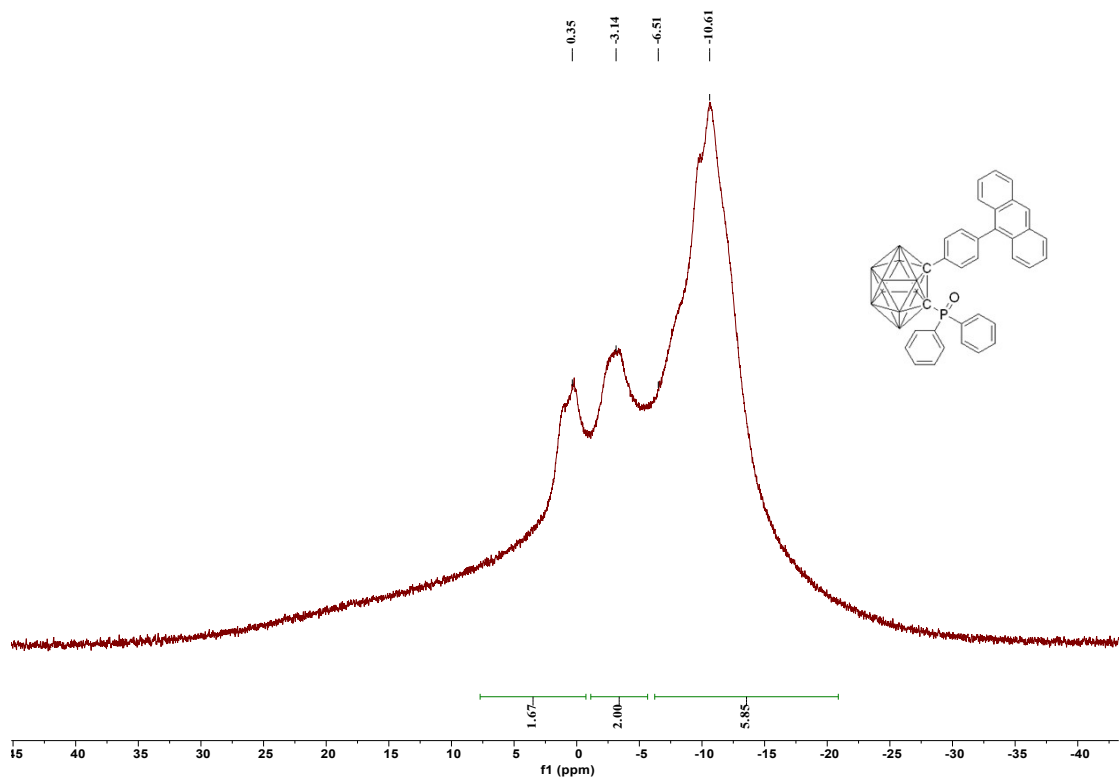

Figure S30  $^{11}\text{B}$  NMR spectrum of **CB-Ph-POAn** in  $\text{CDCl}_3$ .

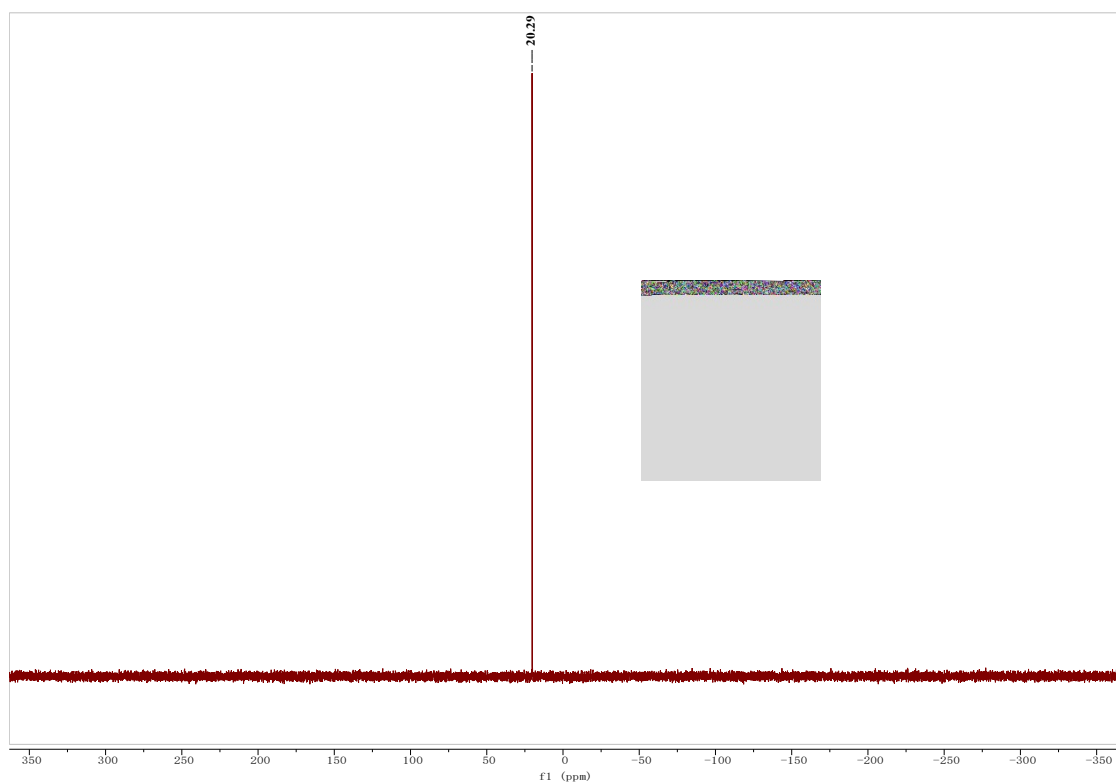

**Figure S31**  $^{31}\text{P}$  NMR spectrum of **CB-Ph-POAn** in  $\text{CDCl}_3$ .

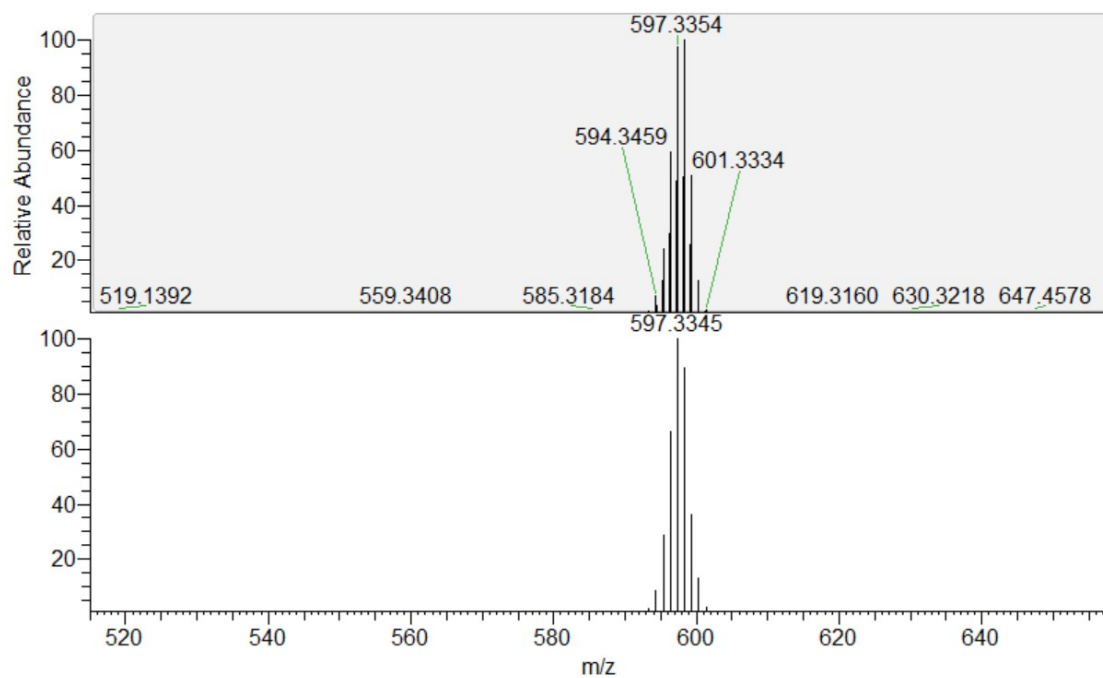

**Figure S32** HRMS spectrum of **CB-Ph-POAn**.

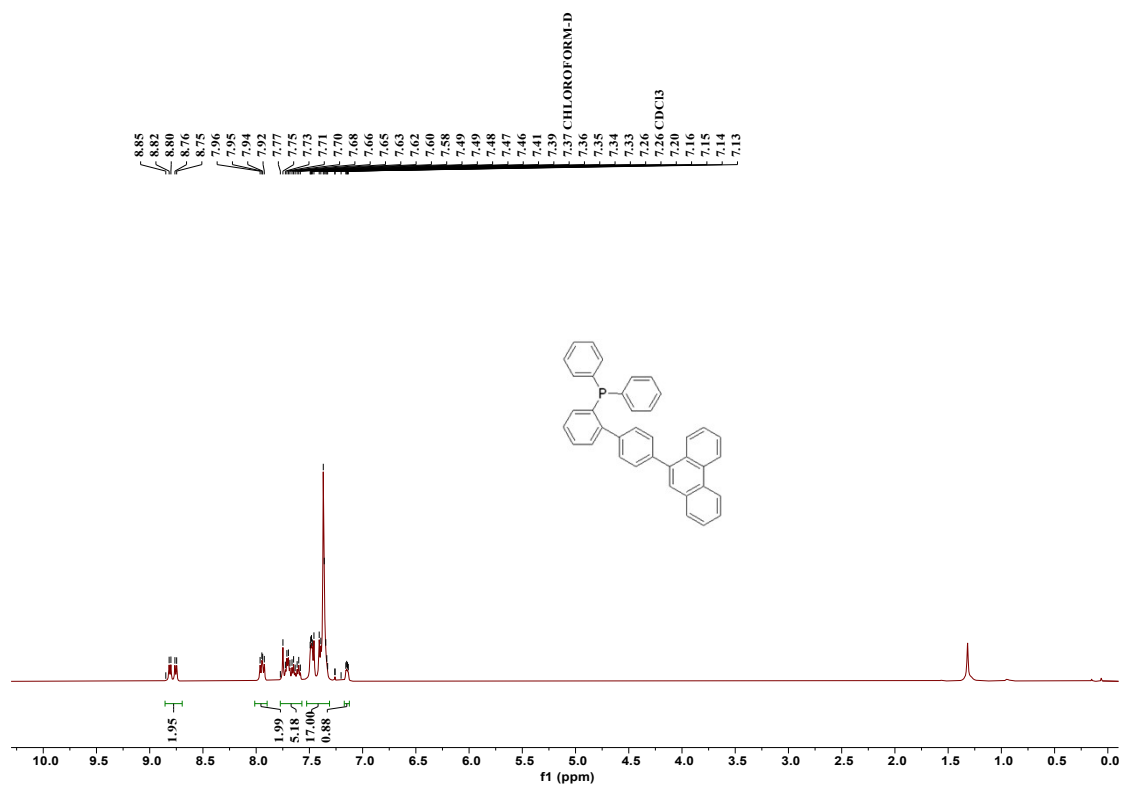

Figure S33 <sup>1</sup>H NMR spectrum of Ph-Ph-P in CDCl<sub>3</sub>.

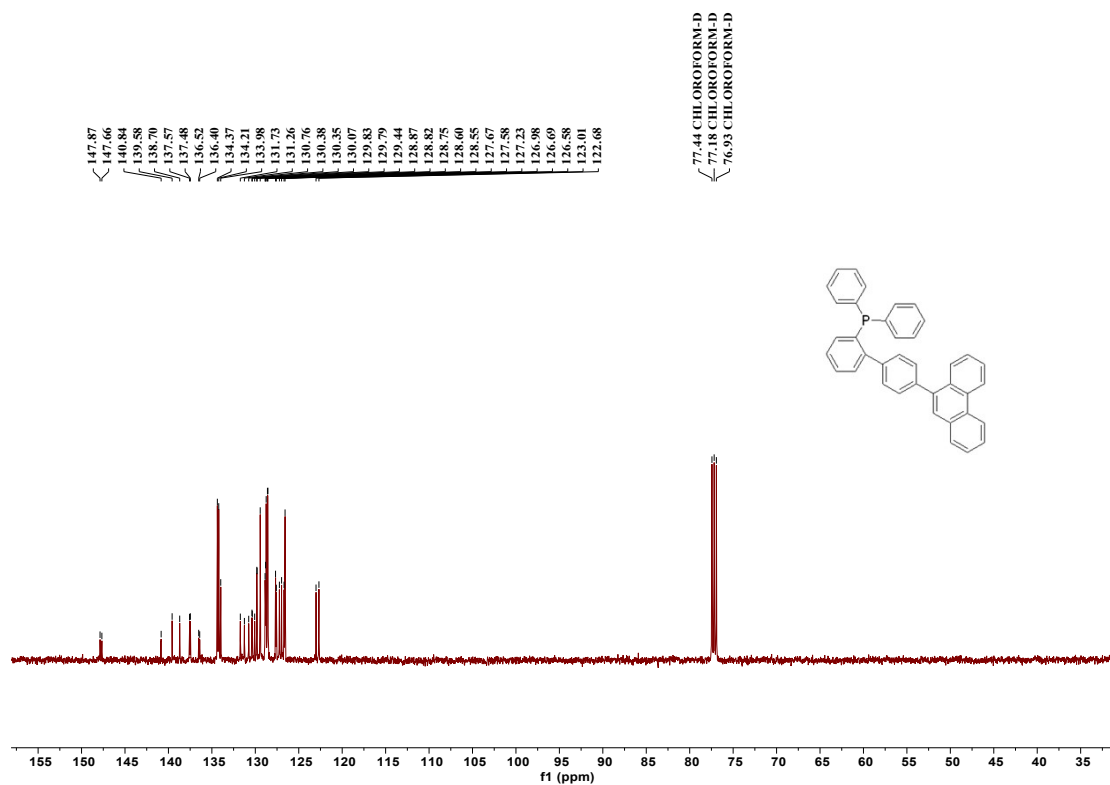

Figure S34 <sup>13</sup>C NMR spectrum of Ph-Ph-P in CDCl<sub>3</sub>.

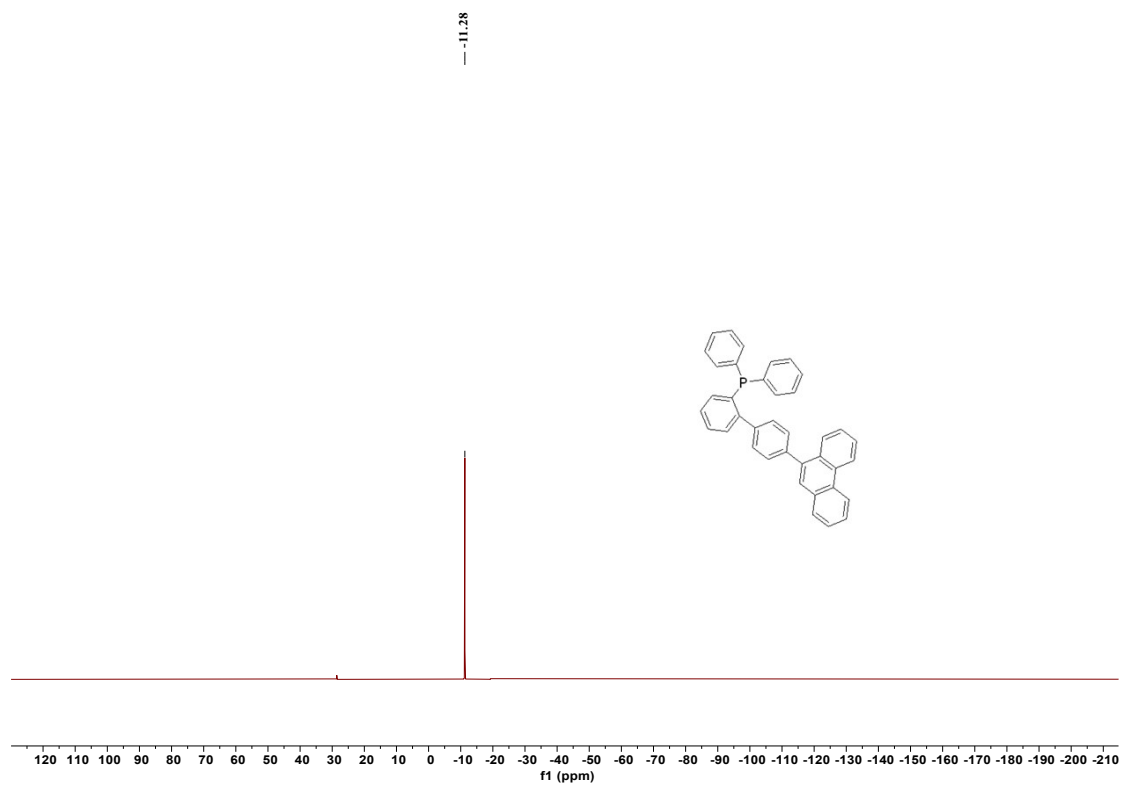

**Figure S35**  $^{31}\text{P}$  NMR spectrum of **Ph-Ph-P** in  $\text{CDCl}_3$ .

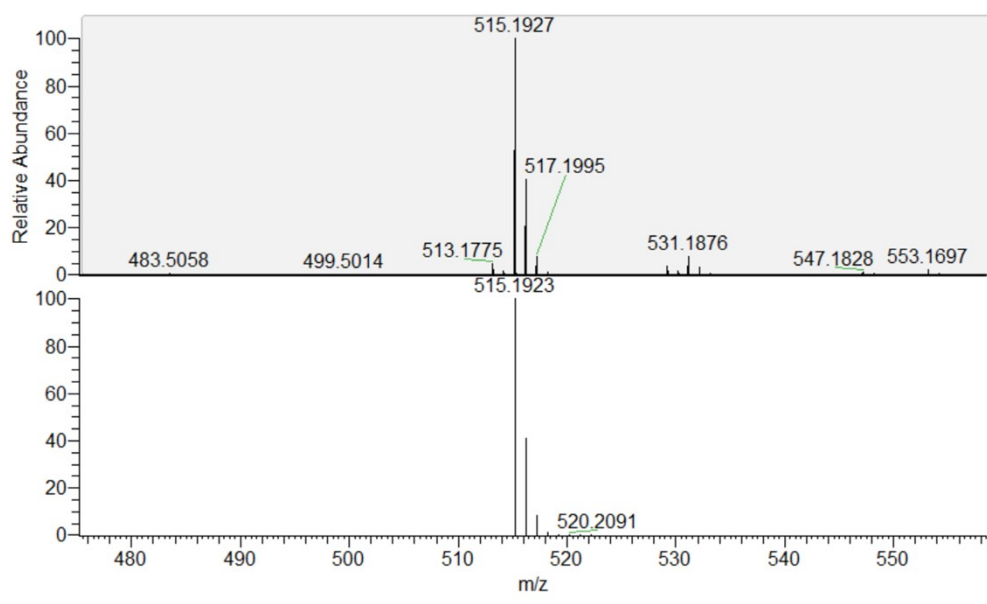

**Figure S36** HRMS spectrum of **Ph-Ph-P**.

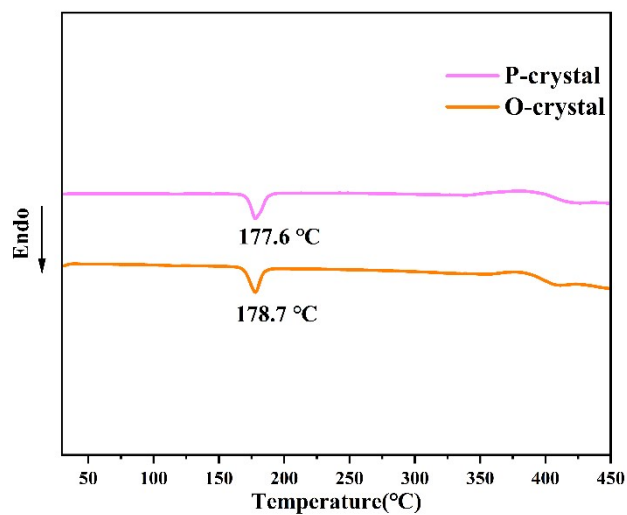

**Figure S37** DSC curves of P-crystal and O-crystal under nitrogen.

## V References

1. D. Tu, P. Leong, S. Guo, H. Yan, C. Lu and Q. Zhao, *Angew Chem Int Ed*, 2017, **56**, 11370-11374.
